# Supplementary material for: Hydrolysis of 1,8- and 2,3-naphthalic anhydrides and the mechanism of cyclization of 1,8-naphthalic acid in aqueous solutionsThe IUPAC name for naphthalic acid is napthalenedicarboxylic acid.Electronic supplementary information (ESI) available: tables containing the values of the rate constants. See http://www.rsc.org/suppdata/p2/b1/b104148g/
Source: Royal Society of Chemistry journal article supplement (doi:10.1039/b104148g), 2001-10-24
Supplement: b104148g.doc [file b104148g.doc]

**Supplementary data**

**TITRATION OF 1,8-NAPHTHALIC ACID- ABSORBANCE AT 320 nm- 300C**

# Figure 1B

pH Abs

7.92 0.1987

6.98 0.2034

6.06 0.2230

5.45 0.2736

5.02 0.3158

4.47 0.3673

3.93 0.4051

3.38 0.4390

2.87 0.4756

2.33 0.5000

2.19 0.5000

1.50 0.5124

- 1. 0.5001

**TITRATION OF 2,3-NAPHTHALIC ACID- ABSORBANCE AT 255 nm- 300C**

# Figure 1A

8.0 1.1977

7.0 1.1974

6.0 1.2753

5.5 1.3700

5.0 1.5681

4.5 1.7234

4.0 1.8280

3.5 1.8327

3.0 1.7359

2.5 1.5770

2.0 1.5013

1.5 1.3310

1.0 1.3626

- 1. 1.3747

**TITRATION OF 2,3-NAPHTHALIC ACID (FLUORESCENCE EMISSION AT 378 nm (300C)**

# Figure 1C

pH/Ho Relative FLUORESCENCE intensity

-2.12 149

-1.94 157

-1.76 201

-1.59 214

-1.41 340

-1.23 369

-1.05 413

-0.87 694

-0.67 922

-0.45 1294

-0.21 1850

0.19 2576

1.00 3345

2.00 3242

2.20 3158

2.80 2909

3.20 2791

3.60 2664

4.00 2435

4.40 2299

4.80 1590

5.02 1730

5.32 1344

5.67 1340

6.00 663

6.02 714

6.86 531

- 1. 511

12.3 475

**HYDROLYSIS OF 2,3-NAPHTHALIC ANHYDRIDE AT 300C**

## **Figure 2**

pH k (s-1)

0.2500 2.7300e-3

1.6700 2.8300e-3

3.3500 2.7800e-3

3.7800 2.8300e-3

4.5800 3.4500e-3

4.7800 4.7800e-3

5.2800 2.9700e-3

5.9300 2.9400e-3

6.4500 3.7900e-3

7.6200 0.0134

7.7500 0.0151

7.9500 0.0202

8.1200 0.0268

8.6000 0.0544

8.6800 0.0607

8.9400 0.1310

### Data of Figure 3

CICLYZATION OF 1,8-NAPHTHALIC ACID AT 300C ()

pH/Ho k (s-1)

-2.1200 1.6700e-2

-1.4100 4.1310e-3

-1.2300 2.9790e-3

-0.8700 1.6880e-3

-0.6700 1.2680e-3

-0.4500 9.2180e-4

-0.2100 6.2400e-4

0.1600 5.6200e-4

0.5400 3.6300e-4

1.0600 2.1100e-4

1.8600 1.8400e-4

2.4300 1.9000e-4

2.7500 1.7200e-4

3.3300 1.4500e-4

3.6100 1.2000e-4

3.9400 9.0000e-5

4.6100 4.7600e-5

1,8-NAPHTHALIC ANHYDRIDE at 300C ()

pH k (s-1)

2.3700 2.0400e-4

2.7500 1.7300e-4

4.6100 7.1800e-5

4.9300 6.0200e-5

5.2800 5.4900e-5

6.1700 5.6200e-5

6.2300 9.2500e-5

7.6000 8.4600e-4

7.8000 1.2700e-3

8.0000 1.8100e-3

8.2000 2.8600e-3

8.2000 3.6200e-3

8.5000 6.3900e-3

8.7000 0.0100

9.0000 0.0160

1,8-NAPHTHALIC ANHYDRIDE AT 500C ()

pH/Ho k (s-1)

-3.0000 0.5223

-1.9400 0.0705

-1.4300 0.0267

-1.2000 0.0211

-1.0700 0.0146

-0.8700 0.0124

-0.6700 7.5100e-3

-0.4500 5.3100e-3

-0.2100 3.8200e-3

0.1500 4.7200e-3

0.1900 2.4600e-3

0.5000 2.4600e-3

1.0000 1.6600e-3

1.2000 1.6500e-3

1.3860 1.6700e-3

1.5000 1.5500e-3

1.6050 1.5800e-3

1.8100 1.6300e-3

2.0000 1.3600e-3

2.2500 1.5500e-3

2.5000 1.3600e-3

2.7500 1.4800e-3

3.0000 8.6000e-4

4.0000 5.2000e-4

4.5000 3.9000e-4

5.0000 4.5000e-4

5.5000 4.8000e-4

6.0000 6.5000e-4

6.5000 1.2900e-3

7.0990 3.4400e-3

7.5000 8.3900e-3

8.0000 0.0174

8.5000 0.0513

1. 0.1477

EFFECT OF pH ON THE ABSORBANCE (340 nm) AT EQUILIBRIUM OF THE REACTION BETWEEN 1,8-ACID AND 1,8-AN AT 500C

### Figure 4

pH/Ho Abs

-2.7800 0.4960

-1.7800 0.4930

-1.2800 0.4810

-1.0000 0.4850

-0.8800 0.4740

-0.6100 0.4700

-0.5000 0.4550

-0.2800 0.4500

-0.0550 0.4400

0.1100 0.4300

0.3900 0.4200

0.5500 0.4100

0.8900 0.4200

1.3900 0.4100

1.7000 0.4040

1.8900 0.4040

2.0000 0.3880

2.4400 0.4000

2.6000 0.3880

2.8900 0.3770

3.6000 0.3370

4.0000 0.2480

4.3300 0.1890

4.5500 0.1220

4.7800 0.0703

5.0000 0.0400

5.2800 0.0440

5.5000 0.0148

- 1. 0.0200

7.0000 0.0214

10.0000 3.0000e-3

1. 7.4000e-3
